# Supplementary material for: Tool evaluation for the detection of variably sized indels from next generation whole genome and targeted sequencing data
Source: PLoS Comput Biol. 2022 Feb 17;18(2):e1009269. doi: 10.1371/journal.pcbi.1009269 (PMC8916674; doi:10.1371/journal.pcbi.1009269)
Supplement: S5 Table — Summary evaluation results of variant calling tools with GIAB NA24358 WES data. Evaluation results were generated by hap.py. (XLSX) [file pcbi.1009269.s017.xlsx]

## Sheet: Sheet1
S5 Table. Evaluation results of variant calling tools with GIAB NA24385 WES data. Summary evaluation results of variant calling tools with GIAB NA24358 WES data. Evaluation results were generated by hap.py.
Variant calling tools	Type	Filter	TRUTH.TOTALa	TRUTH.TPb	TRUTH.FNc	QUERY.TOTALd	QUERY.FPe	QUERY.UNKf	FP.gtg	FP.alh	METRIC.Recalli	METRIC.Precisionj	METRIC.Frac_NAk	METRIC.F1_Scorel	TRUTH.TOTAL.het_hom_ratiom	QUERY.TOTAL.het_hom_ration
DeepVariant	INDEL	ALL	5463	5027	436	7596	198	2301	72	77	0.92019	0.962606	0.302923	0.940921	1.40347	1.44282
DeepVariant	INDEL	PASS	5463	5027	436	7596	198	2301	72	77	0.92019	0.962606	0.302923	0.940921	1.40347	1.44282
FermiKit	INDEL	ALL	5463	4634	829	7514	938	1898	165	166	0.848252	0.832977	0.252595	0.840545	1.40347	1.82878
FermiKit	INDEL	PASS	5463	3239	2224	4877	329	1274	131	107	0.592898	0.908687	0.261226	0.717587	1.40347	1.24106
GATK	INDEL	ALL	5463	4971	492	8269	583	2653	103	147	0.90994	0.896189	0.320837	0.903012	1.40347	1.78741
GATK	INDEL	PASS	5463	4971	492	8269	583	2653	103	147	0.90994	0.896189	0.320837	0.903012	1.40347	1.78741
Pindel	INDEL	ALL	5463	3711	1752	5477	459	1307	288	97	0.679297	0.889928	0.238634	0.770476	1.40347	1.56906
Pindel	INDEL	PASS	5463	3711	1752	5477	459	1307	288	97	0.679297	0.889928	0.238634	0.770476	1.40347	1.56906
Platypus	INDEL	ALL	5463	5013	450	8824	778	2933	129	356	0.917628	0.867934	0.332389	0.892089	1.40347	2.01074
Platypus	INDEL	PASS	5463	3965	1498	5332	93	1245	26	55	0.725792	0.977245	0.233496	0.832955	1.40347	1.34042
Strelka2	INDEL	ALL	5463	5068	395	8500	627	2737	56	169	0.927695	0.891202	0.322	0.909083	1.40347	1.92305
Strelka2	INDEL	PASS	5463	5011	452	8069	456	2534	36	130	0.917262	0.917615	0.314041	0.917438	1.40347	1.88487
VarScan	INDEL	ALL	5463	3878	1585	6270	745	1647	579	134	0.709866	0.838849	0.262679	0.768987	1.40347	2.77029
VarScan	INDEL	PASS	5463	3878	1585	6270	745	1647	579	134	0.709866	0.838849	0.262679	0.768987	1.40347	2.77029
aTRUTH.TOTAL: Total number of truth variants.
bTRUTH.TP: Number of true-positive calls in truth representation.
cTRUTH.FN: Number of false-negative calls = calls in truth without matching query call.
dQUERY.TOTAL: Total number of query calls.
eQUERY.FP: Number of false-positive calls in the query file (mismatched query calls within the confident regions).
fQUERY.UNK: Number of query calls outside the confident regions.
gFP.gt: Number of genotype mismatches (alleles match, but different zygosity).
hFP.al: Number of allele mismatches (variants matched by position and not by haplotype).
iMETRIC.Recall: Recall for truth variant representation = TRUTH.TP / (TRUTH.TP + TRUTH.FN).
jMETRIC.Precision: Precision of query variants = QUERY.TP / (QUERY.TP + QUERY.FP).
kMETRIC.Frac_NA: Fraction of non-assessed query calls = QUERY.UNK / QUERY.TOTAL.
lMETRIC.F1_Score: Harmonic mean of precision and recall = 2METRIC.RecallMetric.Precision/(METRIC.Recall + METRIC.Precision).
mTRUTH.TOTAL.het_hom_ratio: Het/Hom ratio for all truth variants.
nQUERY.TOTAL.het_hom_ratio: Het/Hom ratio for all query variants.
